# Supplementary material
Source: publisher figshare collection journal article supplement (https://acs.figshare.com/ndownloader/files/10648711)
Supplement: Supplementary file 1 [file 10648711]

# Supporting Information

## Compact-Nanobox Engineering of Transition Metal Oxides with Enhanced Initial Coulombic Efficiency for Lithium-Ion Battery Anodes

*Yanfei Zhu,<sup>†</sup> Aiping Hu,<sup>†,§</sup> Qunli Tang,<sup>†,§</sup> Shiyong Zhang,<sup>§</sup> Weina Deng,<sup>§</sup> Yanhua Li,<sup>†</sup> Zheng Liu,<sup>†</sup>  
Binbin Fan,<sup>†</sup> Kuikui Xiao,<sup>†</sup> Jilei Liu,<sup>\*,‡</sup> and Xiaohua Chen<sup>\*,†,§</sup>*

<sup>†</sup>College of Materials Science and Engineering, Hunan University, Changsha, 410082, China

<sup>‡</sup>Division of Physics and Applied Physics, School of Physical and Mathematical Sciences,  
Nanyang Technological University, 637371, Singapore

<sup>§</sup>Hunan Province Key Laboratory of Applied Environmental Photocatalysis, Changsha  
University, Changsha 410022, China

\*E-mail: [xiaohuachen@hnu.edu.cn](mailto:xiaohuachen@hnu.edu.cn) (Xiaohua Chen)

\*E-mail: [liujilei036@163.com](mailto:liujilei036@163.com) (Jilei Liu)

## Note S1

Because the CoO-CNB has experienced thermal annealing process, we calculate the average crystal size of CoO nanograin *via* Scherrer Equation as the following,

$$\text{Size} = \frac{K\lambda}{FW(S) * \cos(\theta)} \quad \text{Equation S1}$$

where  $K$  denotes a constant,  $\lambda$  denotes wavelength of X-ray (nm),  $FW(S)$  denotes width of sample,  $\theta$  denotes diffraction angle (Rad).

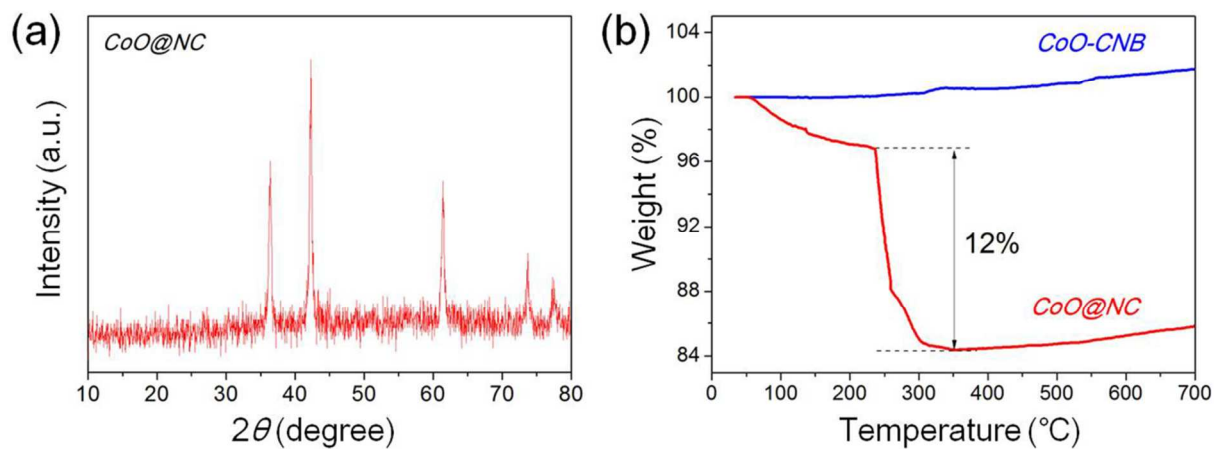

Figure S1. (a) X-ray diffraction pattern of CoO@NC; (b) Thermogravimetric analysis profiles of CoO-CNB and CoO@NC under simulated air atmosphere at a heating rate of  $5^\circ\text{C min}^{-1}$ .

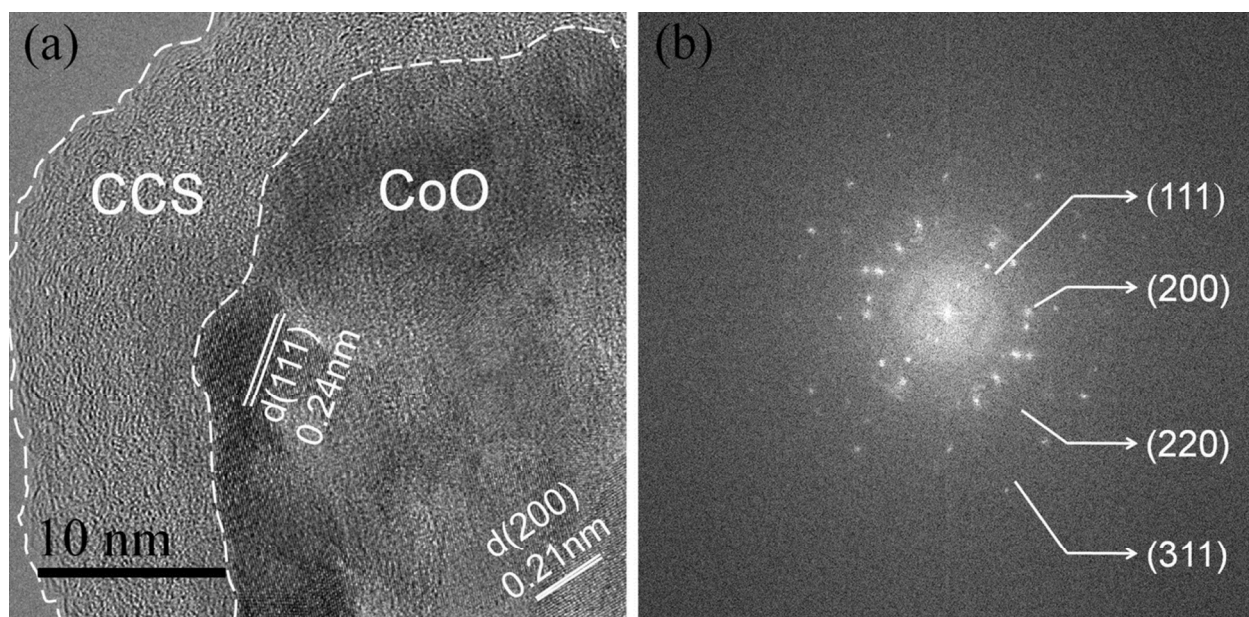

Figure S2. (a) High-resolution transmission electron microscope image of CoO@NC with detailed microstructure information about lattice fringes of CoO and amorphous carbon in the thickness of  $\sim 10$  nm. (b) Corresponding fast Fourier transform pattern of CoO@NC.

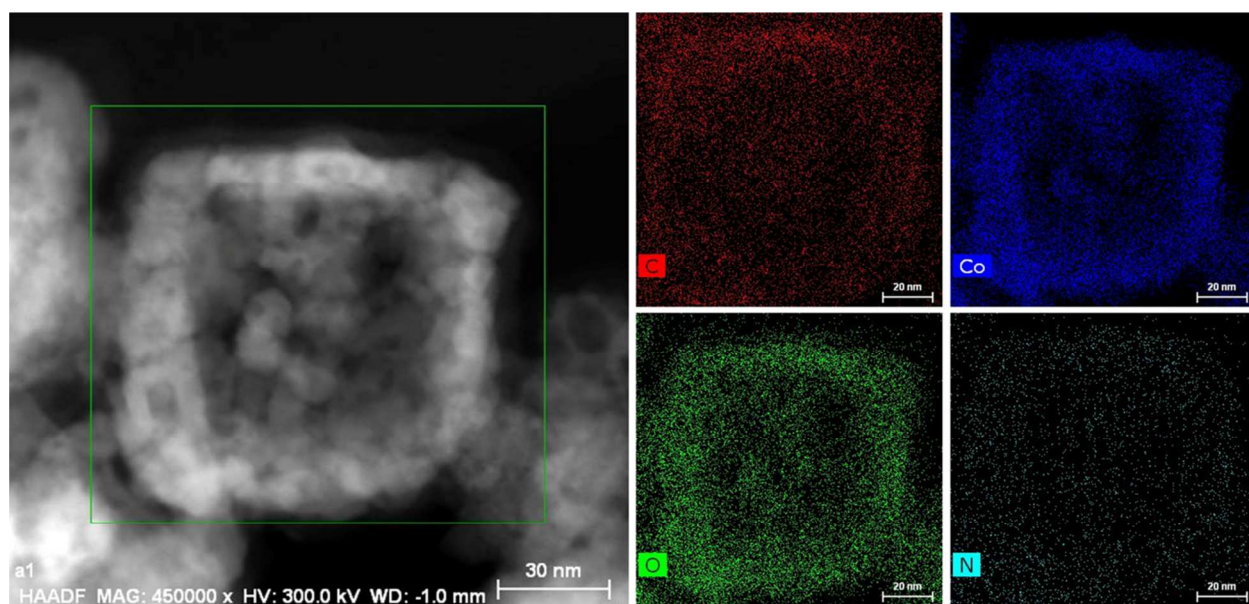

Figure S3. Elemental mapping of CoO@NC sample.

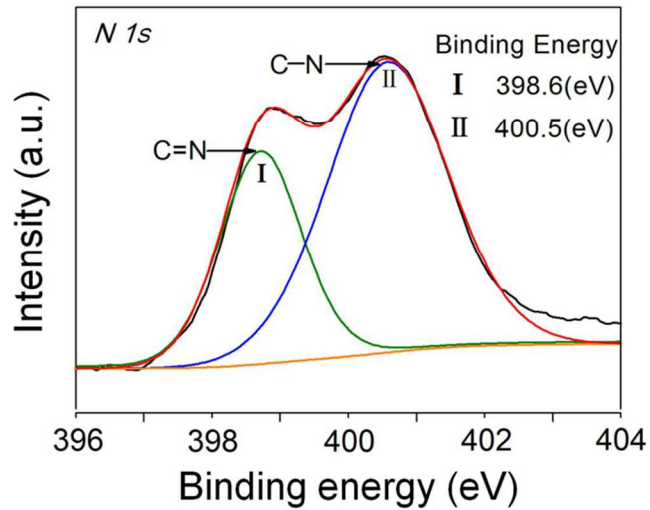

Figure S4. High-resolution X-ray photoelectron spectroscopy of N 1s in CoO@NC sample.

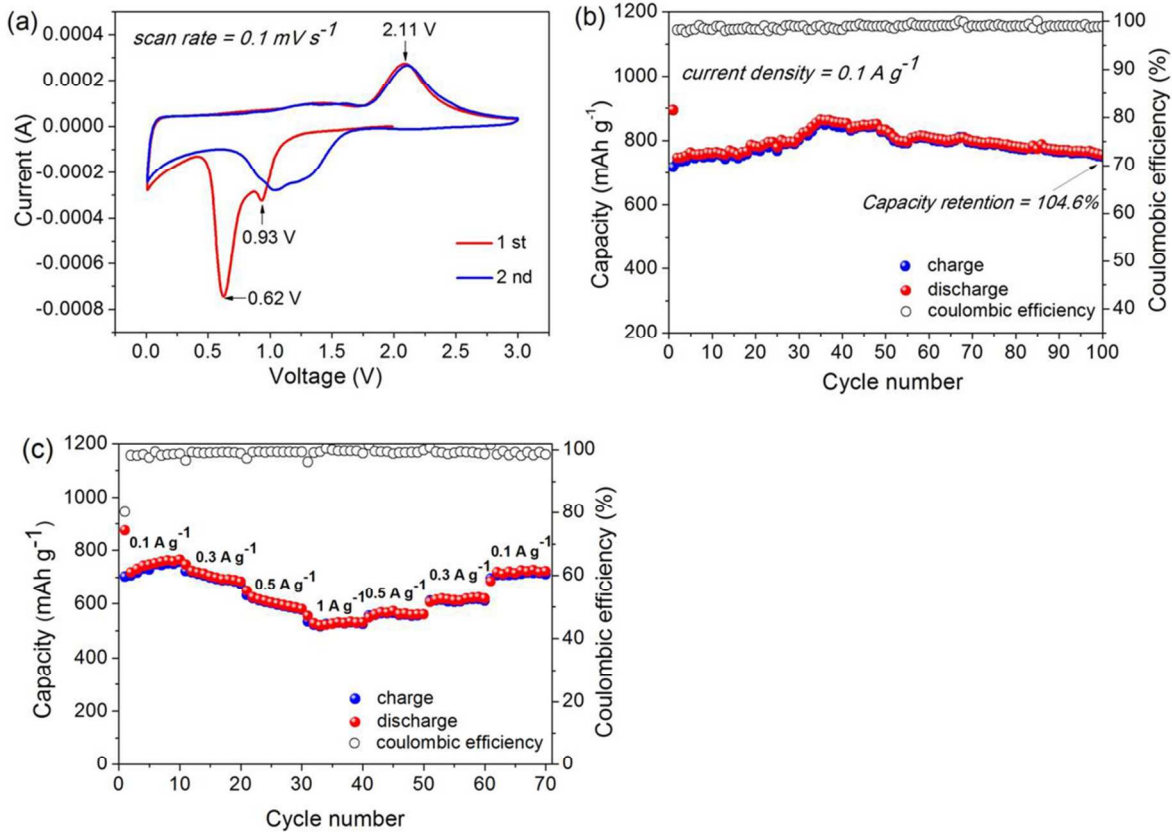



Figure S5. Electrochemical performance of CoO@NC electrode: (a) Cyclic voltammetry curves at a scan rate of  $0.1 \text{ mV s}^{-1}$  in the potential range from 3.0 to 0.01 V; (b) Cycling performance and corresponding Coulombic efficiency with initial 100 cycles performed at  $0.1 \text{ A g}^{-1}$ ; (c) Rate capabilities and corresponding Coulombic efficiency at current densities of 0.1, 0.3, 0.5 and  $1.0 \text{ A g}^{-1}$ , respectively.

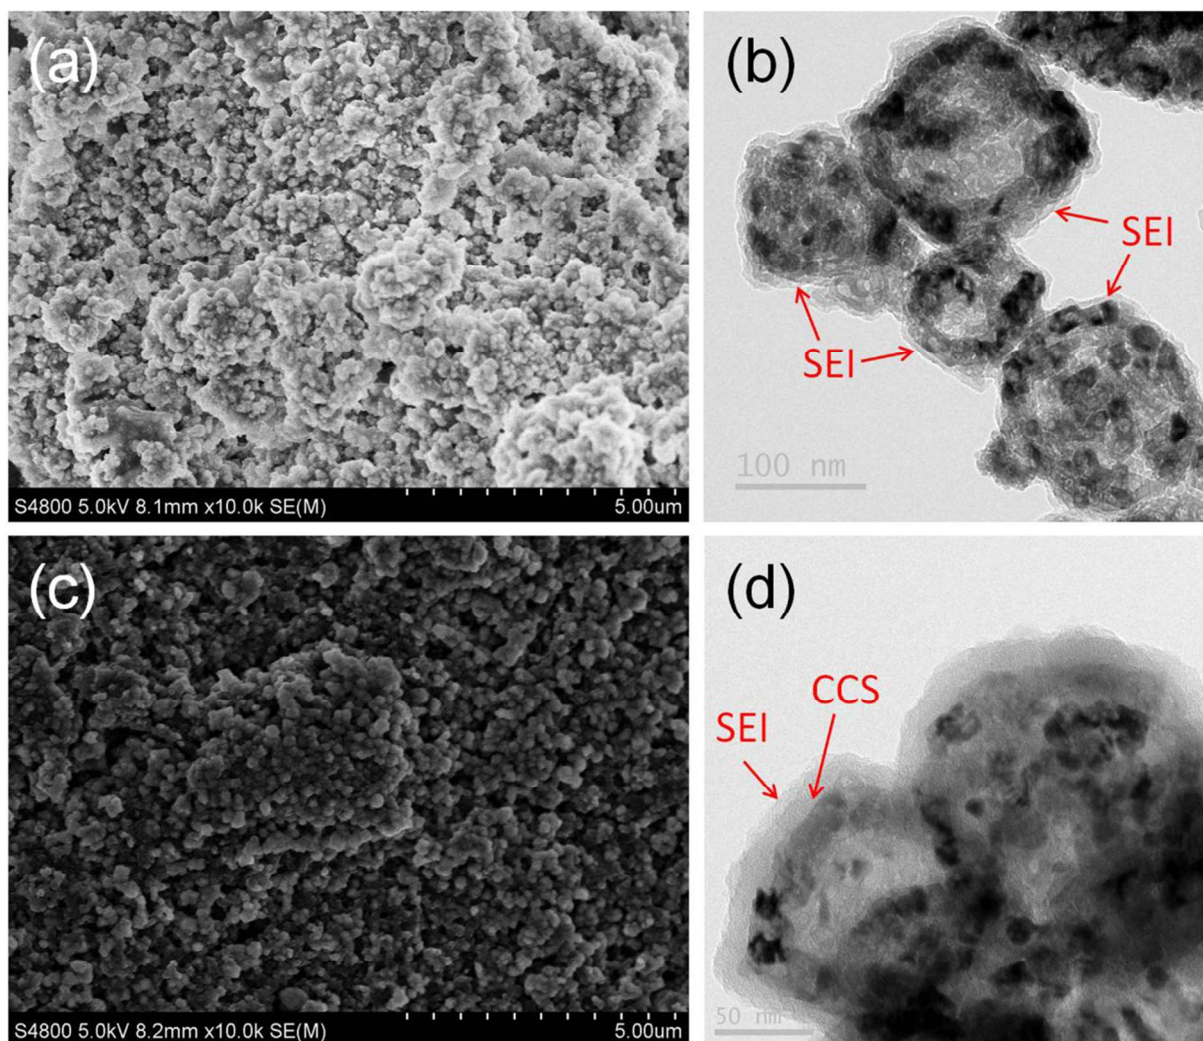

Figure S6. Field-emission scanning electron microscopy (FESEM) and transmission electron microscopy (TEM) images of CoO-CNB and CoO@NC electrodes after rate performance tests:

(a, b) FESEM and TEM images of cycled CoO-CNB, respectively; (c, d) FESEM and TEM images of cycled CoO@NC, respectively.
